# Supplementary material for: Parameter Trajectory Analysis to Identify Treatment Effects of Pharmacological Interventions
Source: PLOS journal article supplement (doi:10.1371/journal.pcbi.1003166), 2013-08-01
Supplement: S1 (10.1371/journal.pcbi.1003166.s001) [file journal.pcbi.1003166.s001]

301 Moved Permanently

# Moved Permanently

The document has moved here.

---

Apache Server at www.ploscompbiol.org Port 80
